# Supplementary material
Source: PubMed Central journal article supplement (PMC6214767)
Supplement: NIHMS980783-supplement-2.pdf [file NIHMS980783-supplement-2.pdf]

**Supplementary Table 2****Patient Characteristics**

| <b>Characteristics</b>                     | <b>Number of Patients</b> |
|--------------------------------------------|---------------------------|
| <b>Sample Type</b>                         |                           |
| Clear cell renal cell carcinoma (ccRCC)    | <b>53</b>                 |
| Normal adjoining tissue from same patients | <b>53</b>                 |
| <b>Age</b>                                 |                           |
| Average age (Range)                        | <b>63.41 (59-88)</b>      |
| <b>Fuhrman grade</b>                       |                           |
| 1-2                                        | <b>34</b>                 |
| 3-4                                        | <b>17</b>                 |
| <b>Survival</b>                            |                           |
| Alive                                      | <b>32</b>                 |
| Deceased                                   | <b>21</b>                 |
