# Supplementary material
Source: PubMed Central journal article supplement (PMC6214767)
Supplement: NIHMS980783-supplement-3.pdf [file NIHMS980783-supplement-3.pdf]

Supplementary Figure 1

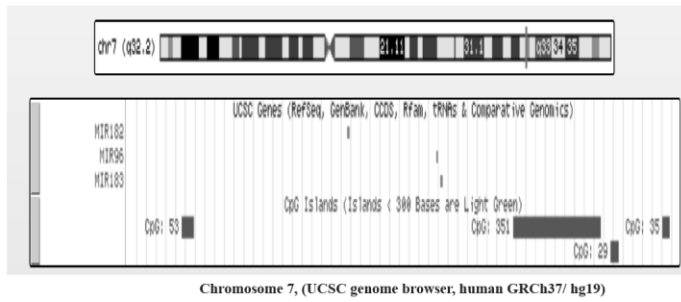

### Supplementary Fig. S1.

Schematic diagram of CpG islands in the promoter region of miR-182-5p on chromosome 7 from UCSC genome browser.
